# Supplementary material
Source: publisher figshare collection journal article supplement (https://acs.figshare.com/ndownloader/files/4473622)
Supplement: Supplementary file 1 [file 4473622]

# A “two-step” chronoamperometric method for studying the anaerobic inactivation of an oxygen tolerant NiFe hydrogenase

## Supplementary material

Vincent Fourmond, Pascale Infossi, Marie-Thérèse Guidici-Orticoni,  
Patrick Bertrand, Christophe Léger

[doi:10.1021/ja910685j](https://doi.org/10.1021/ja910685j)

### S1 Influence of the high-potential slope of $i(E)$ on the value of $E_{\text{switch}}$ in the limit of zero scan rate

We have derived the value of  $E_{\text{switch}}^{v \rightarrow 0}$  in the stationary limit, by assuming that  $i(E)$  is independent on potential in the potential range of potential around  $E_{\text{switch}}^{v \rightarrow 0}$  (eq. 18). However, the data in figure 5 suggest that  $E_{\text{switch}}^{v \rightarrow 0}$  may fall in the region where  $i(E)$  depends linearly on potential, as predicted by the model in reference 34. Let us now estimate how this shifts the position of the inflection point of  $i(E) = i_A(E) \times A_{\infty}(E)$ .

We are aiming at calculating the position of the inflection point of  $i(E)$  defined by:

$$i(E) = [1 + \epsilon (E - E_{\text{switch}}^{v \rightarrow 0})] A_{\infty}(E) \quad (\text{S1})$$

where  $A_{\infty}(E)$  is a function that displays an inflection point at  $E_{\text{switch}}^{v \rightarrow 0}$ . The second derivative of  $i(E)$  is:

$$i''(E) = [1 + \epsilon (E - E_{\text{switch}}^{v \rightarrow 0})] A_{\infty}''(E) + 2 \epsilon A_{\infty}'(E) \quad (\text{S2})$$

The inflection point of  $i(E)$  is shifted with respect to that of  $A_{\infty}(E)$  by a quantity  $\delta E$ , defined by:

$$i''(E_{\text{switch}}^{v \rightarrow 0} + \delta E) = 0 \quad (\text{S3})$$

This translates into:

$$[1 + \epsilon \delta E] A_{\infty}''(E_{\text{switch}}^{v \rightarrow 0} + \delta E) + 2 \epsilon A_{\infty}'(E_{\text{switch}}^{v \rightarrow 0} + \delta E) = 0 \quad (\text{S4})$$

We estimate the values of  $A_{\infty}''(E_{\text{switch}}^{v \rightarrow 0} + \delta E)$  and  $A_{\infty}'(E_{\text{switch}}^{v \rightarrow 0} + \delta E)$  to the first order in  $\delta E$ :

$$A_{\infty}''(E_{\text{switch}}^{v \rightarrow 0} + \delta E) = A_{\infty}''(E_{\text{switch}}^{v \rightarrow 0}) + \delta E A_{\infty}'''(E_{\text{switch}}^{v \rightarrow 0}) = \delta E A_{\infty}'''(E_{\text{switch}}^{v \rightarrow 0}) \quad (\text{S5})$$

$$A_{\infty}'(E_{\text{switch}}^{v \rightarrow 0} + \delta E) = A_{\infty}'(E_{\text{switch}}^{v \rightarrow 0}) + \delta E A_{\infty}''(E_{\text{switch}}^{v \rightarrow 0}) = A_{\infty}'(E_{\text{switch}}^{v \rightarrow 0}) \quad (\text{S6})$$

Keeping only the first-order terms in  $\delta E$  gives:

$$\delta E = - \frac{2 \epsilon A_{\infty}'(E_{\text{switch}}^{v \rightarrow 0})}{A_{\infty}'''(E_{\text{switch}}^{v \rightarrow 0})} \quad (\text{S7})$$

Now, we equate  $A_\infty(E)$  and  $A_\infty(E)$ , hence

$$\frac{A'_\infty(E_{\text{switch}}^{v \rightarrow 0})}{A'''_\infty(E_{\text{switch}}^{v \rightarrow 0})} = -\frac{2}{(\alpha f)^2} = 2.10^{-3} \text{ V}^2 \quad (\text{S8})$$

with  $\alpha = 0.66$ . We identify  $i(E)$  and  $1 + \epsilon(E - E_{\text{switch}}^{v \rightarrow 0})$ , and a linear fit of the green trace of figure 5 returns a value of  $\epsilon$  of about  $2 \text{ V}^{-1}$ . This gives:

$$\delta E = +13 \text{ mV} \quad (\text{S9})$$

Under steady-state conditions,  $E_{\text{switch}}$  is therefore 10 mV to 15 mV greater than the position of the inflection point of  $A_\infty(E)$ , given by eq. 18 in the main text.

## S2 The EC model

In the framework of scheme 1, the equations giving the evolution of the fractions of enzyme in the NiB, I and A forms read:

$$\frac{d[\text{NiB}]}{dt} = -k_r[\text{NiB}] + k_o[\text{I}] \quad (\text{S10})$$

$$\frac{d[\text{A}]}{dt} = -k_{-1}[\text{A}] + k_1[\text{I}] \quad (\text{S11})$$

$$1 = [\text{A}] + [\text{NiB}] + [\text{I}] \quad (\text{S12})$$

We are interested in the evolution of the active fraction  $A(t)$ . The quantity  $A' = [\text{A}] - [\text{A}]_\infty$ , where  $[\text{A}]_\infty$  is the asymptotic value for  $[\text{A}]_\infty$ , is governed by:

$$\frac{d^2 A'}{dt^2} + (k_r + k_o + k_1 + k_{-1}) \frac{dA'}{dt} + (k_r k_1 + k_r k_{-1} + k_o k_{-1}) A' = 0 \quad (\text{S13})$$

The general solution is:

$$A'(t) = A_+ \exp(-k_+ t) + A_- \exp(-k_- t) \quad (\text{S14})$$

with

$$k_\pm = \frac{k_r + k_o + k_1 + k_{-1} \pm \sqrt{(k_r + k_o + k_1 + k_{-1})^2 - 4(k_r k_1 + k_r k_{-1} + k_o k_{-1})}}{2} \quad (\text{S15})$$

on condition that  $k_+ \neq k_-$ .  $A_+$  and  $A_-$  are determined by the initial conditions. In general, the reaction scheme 1, leads to a bi-exponential relaxation. However, a mono-exponential relaxation can be observed in particular cases: (1) after a rapid equilibration between NiB and I (2) when either I, NiB or A is not accumulated (3) after a rapid equilibration between I and A. We rule out the latter because it would lead to a potential dependent  $k_I$ . In the following, we consider the two other cases.

**Case 1** A rapid equilibrium between NiB and I occurs when  $k_r + k_o \gg k_1 + k_{-1}$ . Eq. S15 gives:

$$k_+ \approx k_o + k_r \quad k_- \approx \frac{k_1 k_r}{k_o + k_r} + k_{-1} \quad (\text{S16})$$

The equilibration between NiB and I, which is determined by the high rate  $k_+$ , is too fast to be observed experimentally. The relaxation is governed by the slow rate  $k_-$ , which matches the value of  $(k_A + k_I)$  given by eq. 21.

**Case 2.** The only possibility is that I is not accumulated. This occurs when  $k_o \gg k_r + k_{-1}$  and

$k_1 \gg k_r + k_{-1}$ , and leads to:

$$k_+ \approx k_o + k_1 \qquad k_- \approx \frac{k_r k_1 + k_o k_{-1}}{k_o + k_1} \quad (\text{S17})$$

The depletion of I, which is determined by the high rate  $k_+$ , is not observed. The slow rate  $k_-$  determines the relaxation monitored during the experiment, and matches the value of  $(k_A + k_I)$  given by eq. 21.

### S3 The simplification of equations 22 and 23

Let us now derive the conditions of validity of the simplified equations 24 and 25. Equation 24 only holds when  $k_3 \gg k_o$ , i.e. for

$$E < E_{max\ A} = E^0 + \frac{1}{f(1-\alpha)} \ln \frac{k_3}{k_0} \quad (\text{S18})$$

The fact that the experimental value of  $k_A$  does not deviate from that predicted by eq 24, (fig. 7) implies that  $E_{max\ A}$  is larger than the potential at which the term  $k_{Alim}$  starts to dominate  $k_A$  (about +0.2 V for pH 8). Due to the relatively low value of  $1 - \alpha = 0.4$ , even relatively small values of the ratio  $k_3/k_0$  lead to relatively large values of  $E_{max\ A}$  with respect to  $E^0$ ; for instance, for  $k_3/k_0 = 10$ ,  $E_{max\ A}$  is 150 mV greater than  $E^0$ .

Similarly, the condition for the validity of equation 25 is:

$$E > E_{lim\ I} \quad (\text{S19})$$

where  $E_{lim\ I}$  is the maximum of

$$E^{0'} - \frac{1}{(1-\alpha)f} \ln \frac{k'_0}{k_1} \quad \text{and} \quad E^{0'} - \frac{1}{\alpha f} \ln \frac{k_2}{k'_0} \quad (\text{S20})$$

where the prime parameters characterize the redox couple  $I_2/I_1$ , by analogy with eqs 19.  $E_{lim\ I}$  only needs to be superior to the lowest potential where the determination of  $k_I$  is unambiguous (ie,  $k_I > 0.1 \times k_A$ ).

### S4 Supplementary figures

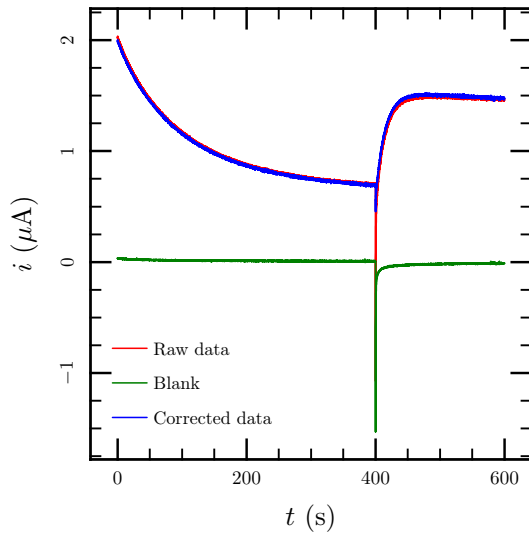

Figure S1: Illustration of the effect of subtracting the capacitive current recorded in a control experiment with no adsorbed enzyme.

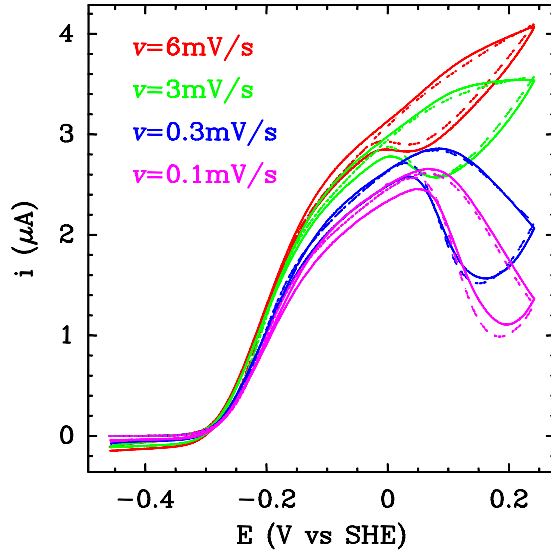

Figure S2: Cyclic voltammograms of adsorbed *A. aeolicus* hydrogenase at different scan rates (solid lines), and the corresponding simulations (dotted lines). Conditions: pH 6.1, 40°C, 1 atm. of  $H_2$ ,  $\omega = 4$  krpm. Parameters:  $k_I = 3.5 \times 10^{-3} s^{-1}$ ,  $\alpha = 0.80$ ,  $k_0 \exp \alpha f E^0 = 0.28 s^{-1}$  and  $k_{Alim} = 5 \times 10^{-4} s^{-1}$ , and the parameters describing the wave shape:  $E_{OH} = -0.212$  V,  $E_{HR} = -0.340$  V,  $k_2/k_0^{max} = 4 \times 10^{-2}$  and  $i_{lim}/\beta d_0 \approx 0.2 \mu A$  (the exact value was adjusted to account for film loss). Film loss during the course of each voltammogram was neglected. The small differences with the parameters used in figure 5 in the main text results from the pH being slightly greater and, possibly, uncertainties in the concentration of dissolved  $H_2$ .

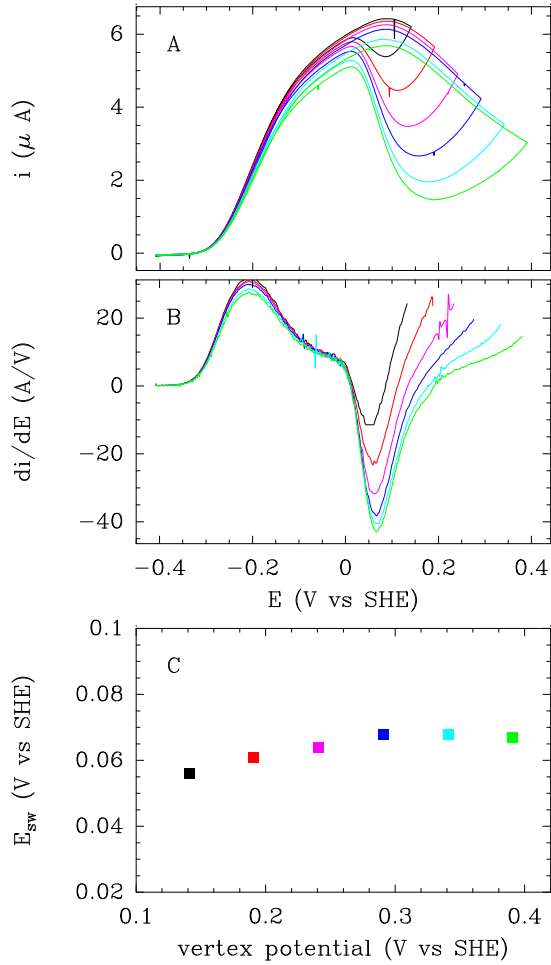

Figure S3: Influence on the value of the vertex (the potential where the direction of the scan is returned) on the value of  $E_{switch}$ . Panel A shows the voltammograms recorded with *A. aeolicus* NiFe hydrogenase adsorbed at a rotating electrode, at pH 6, 40°C, under 1 atm.  $H_2$ . Electrode rotation rate 3 krpm, scan rate  $1.5 mV.s^{-1}$ . Panel B shows the 1<sup>st</sup> derivative of the sweeps towards negative potentials, from which the values of  $E_{switch}$  are determined. Panel C shows the values of  $E_{switch}$  against vertex potential. The color code is the same in all panels.

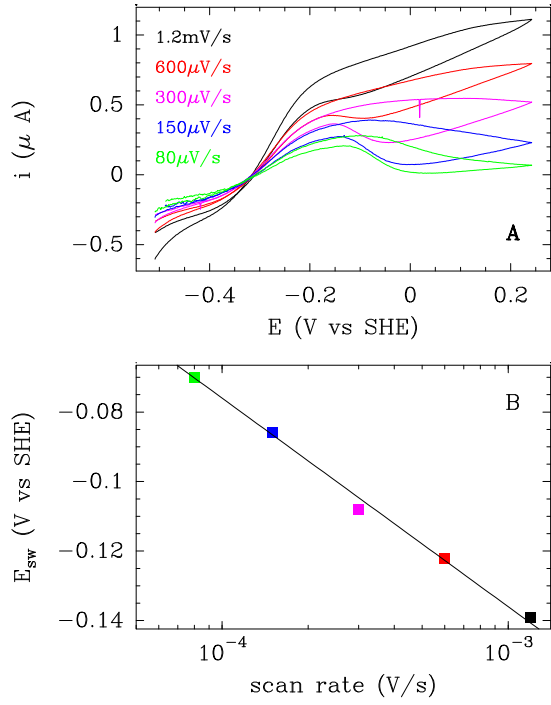

Figure S4: Influence of scan rate on the value of  $E_{\text{switch}}$  in experiments carried out with *D. fructosovorans* NiFe hydrogenase. Panel A shows the voltammograms recorded at pH 5.5, 40°C, under 0.1 atm.  $\text{H}_2$ . Electrode rotation rate 2.2 krpm, scan rate as indicated. Panel B shows the values of  $E_{\text{switch}}$  against scan rate. The color code is the same in panel A and B.

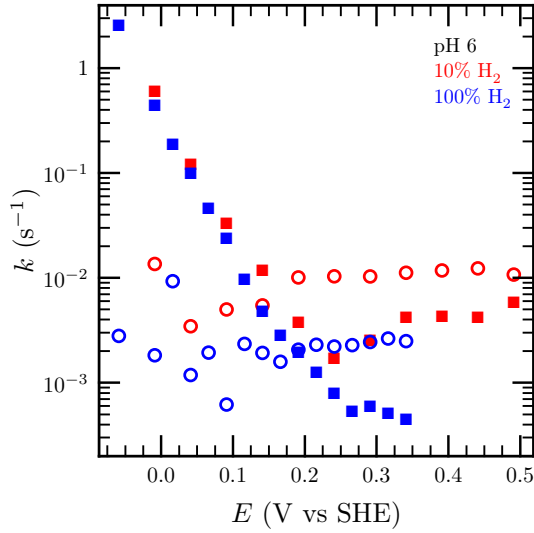

Figure S5: Effect of the variation of  $\text{H}_2$  pressure on activation and inactivation rate constants of *A. aeolicus* NiFe hydrogenase. Open circles show the values of  $k_I$ , filled squares are the corresponding values of  $k_A$ . The red and blue symbol correspond to  $\text{H}_2$  pressure of 0.1 and 1 atm, respectively. Other conditions: 40°C, pH 6,  $\omega = 4$  krpm.

## S5 Supplementary tables

|                                       | <i>A. vinosum</i><br>pH 8.8 | <i>A. aeolicus</i><br>pH 8 |
|---------------------------------------|-----------------------------|----------------------------|
| $E_0$ (mV)                            | -284                        | 0                          |
| $k_1$ ( $\text{s}^{-1}$ )             | 1                           | $4 \cdot 10^{-2}$          |
| $k_{\text{Alim}}$ ( $\text{s}^{-1}$ ) | $7 \cdot 10^{-3\text{a}}$   | $3 \cdot 10^{-4}$          |
| $k_{-1}$ ( $\text{s}^{-1}$ )          |                             | $7 \cdot 10^{-3}$          |

<sup>a</sup>For *A. vinosum*, as only  $k_I + k_A$  is known  $k_{\text{Alim}}$  and  $k_{-1}$  cannot be independently determined, only their sum is known.

Table S1: Values used for the fits of the data for model 1.

|                                       | <i>A. vinosum</i><br>pH 8.8 | <i>A. aeolicus</i><br>pH 8 |
|---------------------------------------|-----------------------------|----------------------------|
| $\alpha$                              | 0.8                         | 0.64                       |
| $k_0 \exp(-f\alpha E^0)$ ( $s^{-1}$ ) | $9 \cdot 10^{-5}$           | $1 \cdot 10^{-2}$          |
| $k_{Alim}$ ( $s^{-1}$ )               | $7 \cdot 10^{-3a}$          | $3 \cdot 10^{-4}$          |
| $k_{-1}$ ( $s^{-1}$ )                 |                             | $7 \cdot 10^{-3}$          |

<sup>a</sup>As for other fits, only the sum of  $k_{-1}$  and  $k_{Alim}$  can be determined.

Table S3: Values used for the fits of the data for model 3.

|                         | <i>A. vinosum</i><br>pH 8.8 | <i>A. aeolicus</i><br>pH 8 |
|-------------------------|-----------------------------|----------------------------|
| $E_0$ (mV)              | -290                        | -160                       |
| $k_1$ ( $s^{-1}$ )      | 1.5                         | 8                          |
| $k_{Alim}$ ( $s^{-1}$ ) | $7 \cdot 10^{-3a}$          | $5 \cdot 10^{-4}$          |
| $k_{-1}$ ( $s^{-1}$ )   |                             | $8 \cdot 10^{-3}$          |
| $\alpha$                | 0.55                        | 0.60                       |
| $k_0$ ( $s^{-1}$ )      | 0.9                         | 2.3                        |

<sup>a</sup>As for other fits, only the sum of  $k_{-1}$  and  $k_{Alim}$  can be determined.

Table S2: Values used for the fits of the data for model 2.
